# Supplementary material
Source: Research Square preprint supplement (doi:10.21203/rs.3.rs-8771405/v1)
Supplement: Supplementary file 1 [file 6ea23d1217df2131ed903eda.docx]

**Supplementary Tables**

**Table S1. AI-driven structure-based analyses of TA25 with HRV-B14 RdRp and 3C protease**

| **Compound** | **Virus** | **Protein** | **Predicted binding energy**  **(AI-Dock-Plus module, Pharmaco-Net)** | **Predicted binding affinity**  **(DeepCalici-Plus module, Pharmaco-Net)** |
| --- | --- | --- | --- | --- |
| TA25 | HRV-B14 | RdRp | -4.74 kcal/mol | 0.974 μM |
| 3C protease | -5.23 kcal/mol | 1.56 μM |

Table S2. Mean of effective concentration 50 (EC50) of TA25 against different strains of human rhinovirus and multiple viruses

| **Treatment** | **Type** | **Family** | **Viruses** | **EC50** |
| --- | --- | --- | --- | --- |
| **[μM]** |
| TA25 | RNA | *Picornaviridae* | HRV-1A | 9.717 |
| *Flaviviridae* | ZIKV | 1.077 |
| *Flaviviridae* | DENV-2 | 5.665 |
| *Orthomyxoviridae* | IBV Victoria | 15.32 |
| DNA | *Poxviridae* | VACV | 1.732 |

**Table S3. Primer sequences of strand-specific RT-PCR and RT-qPCR**

| **Name** | **Purpose** | **Sequence** | **Direction** |
| --- | --- | --- | --- |
| (-) RT primer | cDNA synthesis that targets anti-genomic RNA | 5’-AAC GAT CAA CGC AAT GGA TAT CCA AAA GAG TGG GCG A-3’ | Forward |
| (+) RT primer | cDNA synthesis that targets genomic RNA | 5’-ATC CTG GAC AAT GAA ACG ATT CGC CCA CTC TTT TGG A-3’ | Reverse |
| (-) qPCR primer | RT-qPCR using cDNA synthesized from anti-genomic RNA | 5’-AAC GAT CAA CGC AAT GGA TA-3’ | Forward |
| 5’-AAG GCA CAC TAA ACC TTG AT-3’ | Reverse |
| (+) qPCR primer | RT-qPCR using cDNA synthesized from genomic RNA | 5’-GCA AAC TAT TCA AGC AAT TTG G-3’ | Forward |
| 5’-ATC CTG GAC AAT GAA ACG AT-3’ | Reverse |

**Table S4. Primer sequences of viral genes for RT-qPCR**

| **Virus** | **Gene** | **Sequence** | **Direction** | **Reference** |
| --- | --- | --- | --- | --- |
| HRV-B14 | 5'-UTR | 5’-CCT CCG GCC CCT GAA TG-3’ | Forward | [28] |
| 5’-AAA CAC GGA CAC CCA AAG TAG T-3’ | Reverse |
| HRV-1A | VP1 | 5’-CAA TCA GGC ACC AAT ATG TC-3’ | Forward | In house designed |
| 5’-TGA TGC AAT GCT AAG AAA TGG-3’ | Reverse |
| ZIKV | NS1 | 5’-CRA CTA CTG CAA GYG GAA GG-3’ | Forward | [34] |
| 5’-GCC TTA TCT CCA TTC CAT ACC-3’ | Reverse |
| DENV-2 | E | 5’- CAG GTT ATG GCA CTG TCA CGA T-3’ | Forward | [35] |
| 5’- CAT CTG CAG CAA CAC CAT CTC-3’ | Reverse |
| VACV | E9 | 5’-CGC CTA AGA GTT GCA CAT CCA-3’ | Forward | [34] |
| 5’-CTC TGC TCC ATT TAG TAC CGA TTC T-3’ | Reverse |
| IBV Victoria | HA | 5’-CCT GTT ACA TCT GGG TGC TTT CCT ATA ATG-3’ | Forward | [36] |
| 5’-GTT GAT ARC CTG ATA TGT TCG TAT CCT CKG-3’ | Reverse |
| RSV-A | N | 5’-AGA TCA ACT TCT GTC ATC CAG CAA-3' | Forward | [37] |
| 5’-ATT GAT ACT CCT AAT TAT GAT GTG C-3’ | Reverse |

**Table S5. Primer sequences of human IFN-related and inflammatory genes for RT-qPCR**

| **Gene** | **Sequence** | **Direction** | **Reference** |
| --- | --- | --- | --- |
| RIG-I | 5’-TGT GCT CCT ACA GGT TGT GGA-3’ | Forward | [38] |
| 5’-CAC TGG GAT CTG ATT CGC AAA A-3’ | Reverse |
| IFN-β | 5’-GTC AGA GTG GAA ATC CTA AG-3’ | Forward | [34] |
| 5’-ACA GCA TCT GCT GGT TGA AG-3’ | Reverse |
| ISG15 | 5’-GCGAACTCATCTTTGCCAGTA-3' | Forward | In house designed |
| 5’-CCA GCA TCT TCA CCG TCA G-3’ | Reverse |
| ISG54 | 5’-ATC CCC CAT CGC TTA TCT CT-3’ | Forward | In house designed |
| 5’-CCA CCT CAA TTA ATC AGG CAC T-3’ | Reverse |
| ISG56 | 5’-GGA TTC TGT ACA ATA CAC TAG AAA CCA-3’ | Forward | In house designed |
| 5’-CTT TTG GTT ACT TTT CCC CTA TCC-3’ | Reverse |
| TNFAIP2 | 5’-TAC GCT GGC CGA GAT CAT TC-3’ | Forward | [39] |
| 5’-TCC CCT TGA TGG CCA GGA TA-3’ | Reverse |
| TNFAIP6 | 5’-GGA TGC CTA TTG CTA CAA CCC AC-3’ | Forward | [40] |
| 5’-CTT GAG CCG AAT GTG CCA GTA G-3’ | Reverse |
| CXCL10 | 5’-AAG TGG CAT TCA AGG AGT ACC TC-3’ | Forward | [41] |
| 5’-TGG ATT CAG ACA TCT CTT CTC ACC-3’ | Reverse |
| CXCL11 | 5’-GAG TGT GAA GGG CAT GGC TA-3’ | Forward | [42] |
| 5’-ATG CAA AGA CAG CGT CCT CT-3’ | Reverse |
| STAT1 | 5’-CGG CTG AAT TTC GGC ACC T-3’ | Forward | [43] |
| 5’-CAG TAA CGA TGA GAG GAC CCT-3’ | Reverse |
| GAPDH | 5’-GCA AAT TCC ATG GCA CCG T-3’ | Forward | [34] |
| 5’-TCG CCC CAC TTG ATT TTG G-3’ | Reverse |
