# Supplementary material
Source: Research Square preprint supplement (doi:10.21203/rs.3.rs-8771405/v1)
Supplement: Supplementary file 2 [file b6ba06e71f681fe786059b51.docx]

**Supplementary Figure**

**Figure S1.**


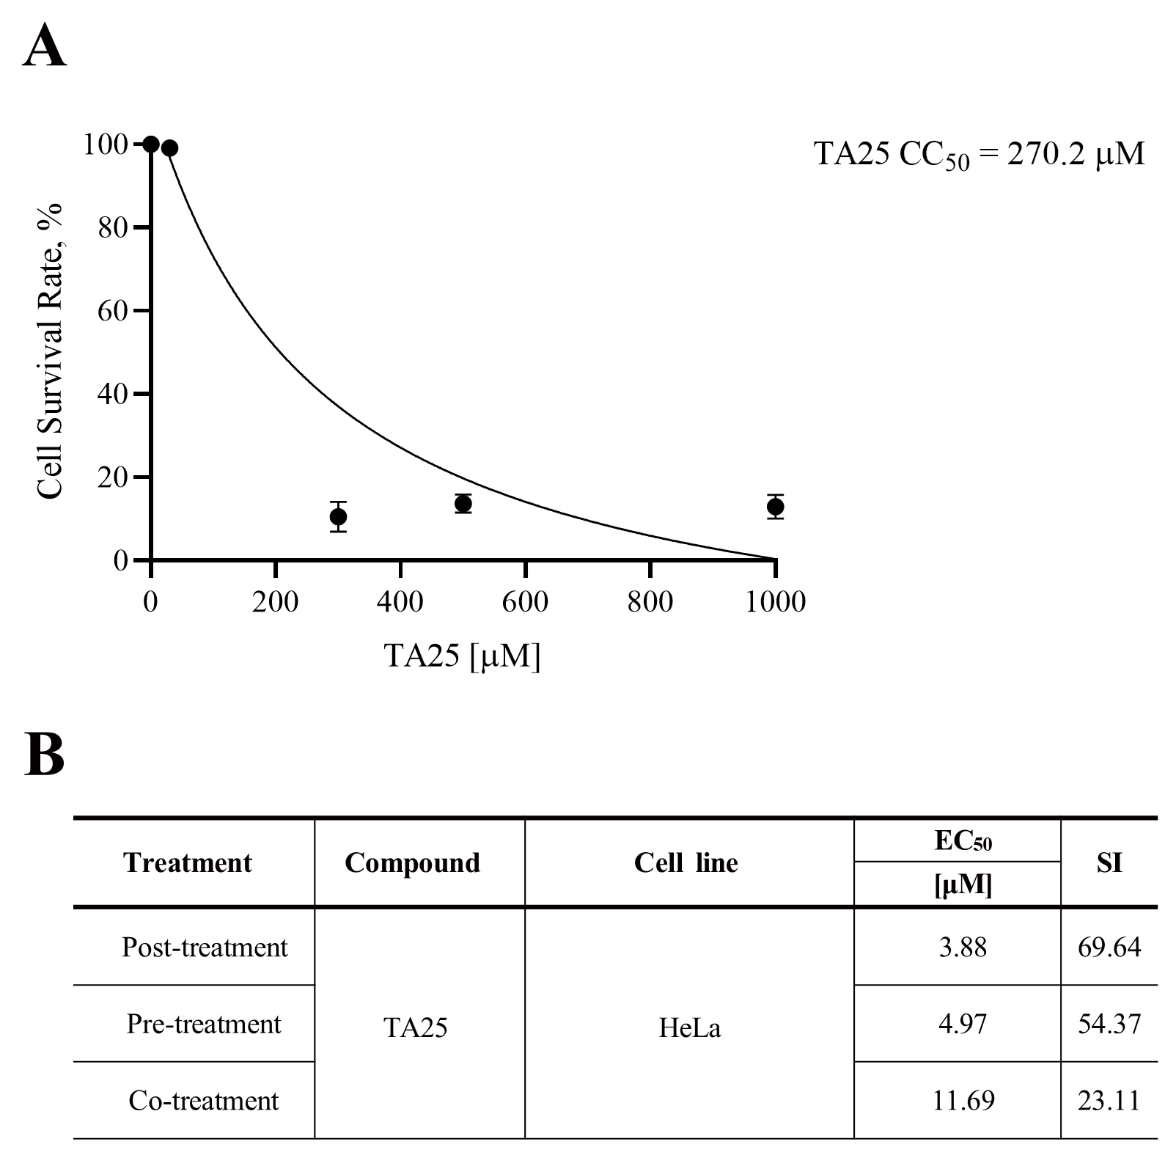


**Supplementary Figure S1. Evaluation of TA25 cytotoxicity in HeLa cells at a maximum of 1,000 μM**

The cytotoxicity of TA25 was tested in HeLa cells incubated for 24 h with concentrations of 30, 100, 300, 500, and 1,000 μM TA25. NADH was detected using an absorbance wavelength of 450 nm. (A) Half-maximal cytotoxic concentration for HeLa cells. (B) Selectivity index (SI), the ratio of CC50/EC50. The data presented are representative of three independent experiments performed in triplicates.
